# Supplementary material
Source: Elsevier journal article supplement (https://www.sciencedirect.com/science/article/pii/S1579212921003773)
Supplement: mmc2 [file S1579212921003773:mmc2.pdf]

## CUESTIONARIO

Buenos días, Soy.....

*Estamos realizando un estudio promovido por la Sociedad Española de Neumología de investigación sobre el conocimiento de la espirometría. La participación en este estudio es voluntaria y todos los datos que se recojan son anónimos. El único inconveniente para usted será la molestia de contestarme a unas breves preguntas, no le llevarán más de 10 minutos.*

*¿Acepta participar y nos da su consentimiento para recoger sus respuestas con el fin de analizarlas de forma anónima?*

*Muchas gracias.*

### DATOS SOCIODEMOGRÁFICOS

S1 ¿Podría indicar qué edad tiene? \_\_\_\_\_

- < 40    ☐ años → **Finalizar entrevista.**  
          ☐ 40-50 años  
          ☐ 51-60 años  
          ☐ 61-70 años  
>70    ☐ años

S2.- Sexo (anotar sin preguntar en función del nombre -si es posible-):

- ☐ Hombre  
☐ Mujer

S3.- CCAA\*:

- |                                             |                                         |
|---------------------------------------------|-----------------------------------------|
| <input type="checkbox"/> Andalucía          | <input type="checkbox"/> Aragón         |
| <input type="checkbox"/> Asturias           | <input type="checkbox"/> C.Madrid       |
| <input type="checkbox"/> Canarias           | <input type="checkbox"/> Cantabria      |
| <input type="checkbox"/> Castilla-La Mancha | <input type="checkbox"/> Castilla-León  |
| <input type="checkbox"/> Cataluña           | <input type="checkbox"/> Extremadura    |
| <input type="checkbox"/> Galicia            | <input type="checkbox"/> Islas Baleares |

---

\* Se dispone de esta información en la BBDD de teléfonos de población general.

- |                                     |                                   |
|-------------------------------------|-----------------------------------|
| <input type="checkbox"/> La Rioja   | <input type="checkbox"/> Navarra  |
| <input type="checkbox"/> País Vasco | <input type="checkbox"/> R.Murcia |
| <input type="checkbox"/> Valencia   |                                   |

S4.- Hábitat\*:

- ☐ Igual o menor 10.000 habitantes
- ☐ mayor 10.000 habitantes

CONOCIMIENTO - DIAGNÓSTICO EPOC

C1.- ¿Podría indicar, en una escala del 0 (muy malo) al 10 (muy bueno), cómo considera su estado de salud general?

C2.- ¿Padece actualmente alguna enfermedad respiratoria?

- ☐ Sí → Ir a C3.
- ☐ No → Ir a C4.
- ☐ Ns/Nc → Ir a C4.

**Conocimiento espontáneo**

C3.- ¿Podría indicar cuál o cuáles? (**No leer opciones**)

- ☐ EPOC (o Enfermedad Pulmonar Obstructiva Crónica)
- ☐ Asma
- ☐ Bronquitis crónica
- ☐ Enfisema
- ☐ Otras (anotar que otra enfermedad respiratoria refiere)

*Si **no** indica EPOC, Bronquitis Crónica o Enfisema en C3 responder a C4.*

*Si indica EPOC en C3 ir a C5.*

C4.- ¿Sabe qué es la EPOC (Enfermedad Pulmonar Obstructiva Crónica)?  
(recoger el conocimiento espontaneo)

- ☐ Sí ¿Cuáles son sus principales síntomas? (no leer)
- ☐ Tos matutina ☐ Pitos al respirar

☐ ☐ Expectoración/Espustos/Flemas   ☐ Ahogo   ☐ Otros

Si en C4 indica que SI (pasar a C6)

No (pasar a C5)

*C5. (Leer) Como sabrá, la EPOC es el nombre de la enfermedad pulmonar obstructiva crónica ,que engloba un conjunto de enfermedades como bronquitis crónica y enfisema y que se caracteriza por, sensación de ahogo, tos, pitos al respirar y cansancio provocada por el consumo de tabaco y otras causas.*

¿la conoce ahora?

☐ No (ir a C7)

☐ Sí (Ir a C6)

C6.- ¿a través de qué medio la conoce?

☐ Medios de comunicación (prensa, radio, Tv)

☐ Internet o redes sociales

☐ Médicos

☐ Farmacéutico

☐ Familiar/ conocido que la padece

C7.- ¿Le ha sido diagnosticada alguna de las siguientes enfermedades?

Consultar **sólo** sobre las que **no** se hayan mencionado en C3.

|                    | Sí                       | No                       | No sabe                  |
|--------------------|--------------------------|--------------------------|--------------------------|
| EPOC               | <input type="checkbox"/> | <input type="checkbox"/> | <input type="checkbox"/> |
| Asma               | <input type="checkbox"/> | <input type="checkbox"/> | <input type="checkbox"/> |
| Bronquitis crónica | <input type="checkbox"/> | <input type="checkbox"/> | <input type="checkbox"/> |
| Enfisema           | <input type="checkbox"/> | <input type="checkbox"/> | <input type="checkbox"/> |

Si **no** indica EPOC, Bronquitis crónica o Enfisema en C7 y tampoco en C2 ir a E1.

TRATAMIENTO de la EPOC (Sólo si indica **EPOC o Bronquitis crónica o Enfisema** en C2 o C7)

T1.- ¿Sigue tratamiento para la EPOC?

- ☐ No
- ☐ Sí → T2. Especificar tratamiento (*leer opciones*):
  - ☐ Inhaladores
  - ☐ Medicamentos
  - ☐ Oxígeno
  - ☐ Tratamiento de apoyo para dejar de fumar (pastillas, parches, etc)

*Si indica inhaladores en T2 ( ir a T3).*

T3. ¿Sería tan amable de indicar en una escala del 0 (nada difícil) al 10 (muy difícil) cómo considera la realización de su tratamiento inhalado?

CARACTERÍSTICAS del sujeto (A todos los encuestados)

P1.- ¿Usted fuma?

- ☐ Sí, Fumador
  - P.1.1.1.- ¿Cuántos cigarrillos fuma al día? \_\_\_\_\_
  - P.1.1.2.- ¿Cuántos años hace que fuma? \_\_\_\_\_
  - P.1.1.3.- ¿Ha intentado dejar de fumar en alguna ocasión?
    - ☐ Sí → P1.1.4.- ¿Cuántas veces? \_\_\_\_\_
    - ☐ No
- ☐ No, Exfumador
  - P 1.2.1 ¿Hace cuanto tiempo dejó de fumar?
  - P.1.2.2.- ¿Cuántos cigarrillos fumaba al día?  
\_\_\_\_\_
  - P.1.2.3.- ¿Cuántos años ha fumado? \_\_\_\_\_
- ☐ No, nunca ha fumado

P2 ¿Ha probado alguna vez otras alternativas al tabaco?

☐ Sí → .- Especificar (*leer opciones*):

☐ cigarrillo electrónico

☐ IQOS

☐ JUUL

☐ Otros...

☐ No

P.3 Nos podría indicar su actitud, en relación con estas alternativas al tabaco tradicional,

☐ Muy favorable

☐ Favorable

☐ No sabe

☐ Desfavorable

☐ Muy desfavorable

P.4 ¿Considera que pueden ayudar a dejar de fumar? (en relación con estas otras alternativas al tabaco tradicional)

☐ SI

☐ NO

☐ No sabe

P.5 ¿Considera que tiene riesgos para la salud?

(en relación a estas otras alternativas al tabaco tradicional)

☐ SI

☐ NO

☐ No sabe

P6.- ¿Al menos hace 2 años sufre tos matutina, de forma más o menos ininterrumpida, por más de 3 meses al año?

☐ Sí   ☐ No

P7.- ¿Al menos hace 2 años sufre tos con expectoración (tos con esputo), de forma más o menos ininterrumpida, por más de 3 meses al año?

☐ Sí ☐ No

P8.- ¿Presenta pitos o ruidos al respirar, de forma más o menos ininterrumpida, por más de tres meses al año?

☐ Sí ☐ No

P9.- ¿Siente sensación de falta de aire (dificultad para coger aire más que para expulsarlo)? (*Leer opciones*)

- ☐ No
- ☐ Al subir una cuesta o dos pisos
- ☐ Al subir un piso
- ☐ Al andar en llano
- ☐ En reposo

*Si ha indicado algunos de los síntomas siguientes: Sí en P6, P7, P8, o **no** ha indicado No en P9 (ir a P10 y a P11)*

P10.- ¿Ha consultado a su médico por estos problemas? (*citar en caso necesario tos, tos con esputo y/o falta de aire, según lo respondido*)

- ☐ No
- ☐ Sí (especificar):
  - ¿Con quién?
    - ☐ médico de cabecera
    - ☐ especialista de los pulmones/neumólogo/a
  - ¿Le han realizado alguna vez una espirometría (soplar por un aparato)?
    - ☐ No ☐ Sí

P11.- ¿Ha acudido alguna vez urgencias por empeoramiento de estos problemas respiratorios? (*citar en caso necesario tos, tos con esputo y/o falta de aire, según lo respondido*)

- ☐ No
- ☐ Sí (especificar cuantas veces en ultimo año):

PERCEPCIÓN de la EPOC (a todos los entrevistados)

F1.- ¿Podría indicar, en una escala del 0 (ausencia gravedad) al 10 (máxima gravedad), cómo considera de grave esta enfermedad, la EPOC? \_\_\_\_\_

F2.- ¿Sería tan amable de indicar en una escala del 0 (ausencia gravedad) al 10 (máxima gravedad) cómo considera cada una de las siguientes enfermedades?

Diabetes..... \_\_\_\_\_

Hipertensión..... \_\_\_\_\_

Angina de pecho..... \_\_\_\_\_

Úlcera de estómago

Artrosis-Artritis..... \_\_\_\_\_

**Muchas gracias por su colaboración**
